# Supplementary material
Source: MDPI journal article supplement (https://www.mdpi.com/2076-3417/7/10/1036)
Supplement: s1 [file s1]

# Supplementary Materials: Macroporous activated carbon derived from rapeseed shell for lithium–sulfur batteries

Mingbo Zheng\*, Qin Hu, Songtao Zhang, Hao Tang, Lulu Li, and Huan Pang\*

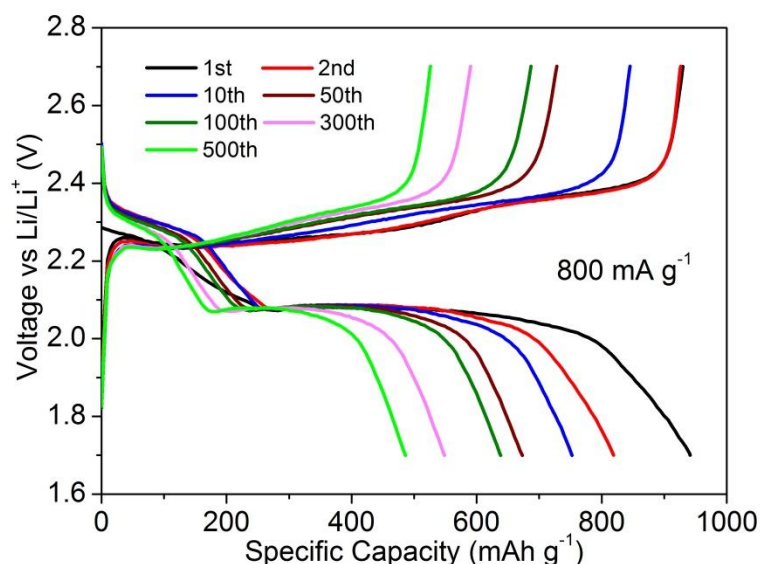

**Figure S1** Galvanostatic charge/discharge profiles of AC/S composite over 500 cycles at 800 mA g<sup>-1</sup>

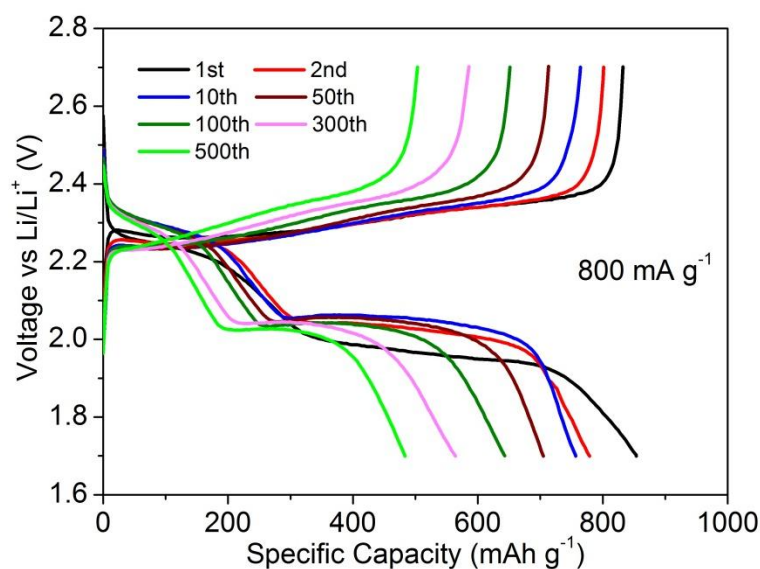

**Figure S2** Galvanostatic charge/discharge profiles of AC/S composite over 500 cycles at 800 mA g<sup>-1</sup> with 1 wt% LiNO<sub>3</sub> as electrolyte additive

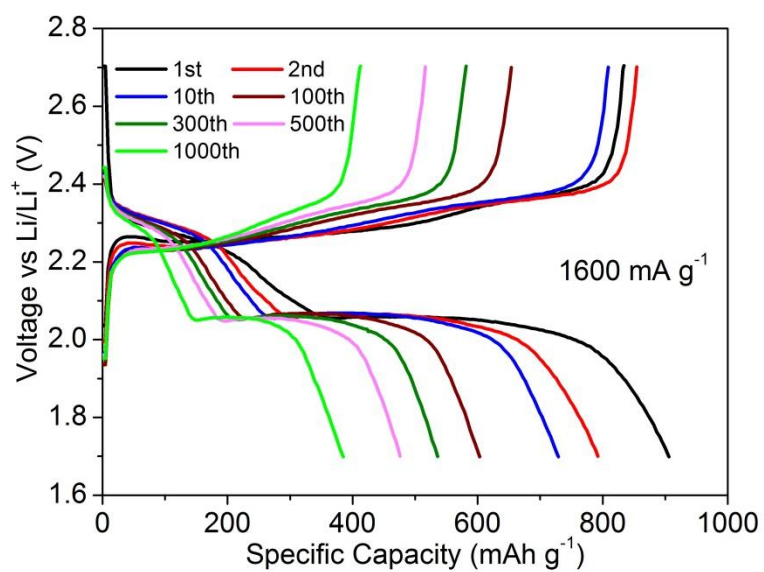

**Figure S3** Galvanostatic charge/discharge profiles of AC/S composite over 1000 cycles at 1600 mA g<sup>-1</sup>.
